# Supplementary material for: Radiomics-Based Prediction of TERT Promotor Mutations in Intracranial High-Grade Meningiomas
Source: MDPI journal article supplement (doi:10.3390/cancers15174415), 2023-09-04
Supplement: s1 [file s1]

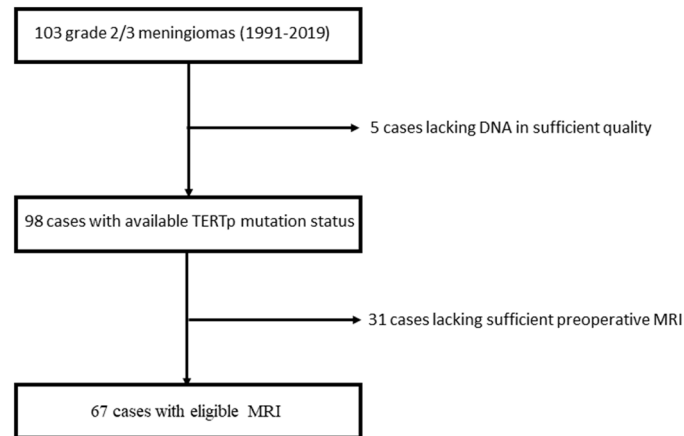

**Figure S1.** Flowchart of patient selection. All cases who underwent surgery for neuropathologically confirmed grade 2/3 meningioma in our institution were included. However, due to the long inclusion period, DNA as well as eligible MRI was not available in a considerable portion of patients. TERTp = TERT promotor; MRI = magnetic resonance imaging

**Table S1.** Baseline clinical and neuropathological characteristics of the study cohort.

| Variable               | N (n%)          |
|------------------------|-----------------|
| Age (median, range)    | 66 years, 23-86 |
| Sex                    |                 |
| Males                  | 34 (51%)        |
| Females                | 33 (49%)        |
| Tumor location         |                 |
| Convexity              | 37 (55%)        |
| Falx/ parasagittal     | 10 (15%)        |
| Skull base             | 18 (27%)        |
| Others                 | 2 (3%)          |
| Initial diagnosis      | 39 (58%)        |
| Recurrence             | 28 (42%)        |
| TERT promotor mutation | 9 (14%)         |
| C228T                  | 7               |
| C250T                  | 1               |
| C250 and C228T         | 1               |
| WHO grade              |                 |
| 2                      | 62 (93%)        |
| 3                      | 5 (7%)          |

**Table S2.** TERT promotor mutation status of the training and independent test data. For statistical reasons, number of samples with mutations was artificially increased (see Table S1).

|                      | Training data | Independent test data | Total data |
|----------------------|---------------|-----------------------|------------|
| Number of images     | 94            | 23                    | 117        |
| TERT mutation (in %) |               |                       |            |
| Yes (mutated)        | 43.62         | 43.48                 | 43.59      |
| No (wildtype)        | 56.38         | 56.52                 | 56.41      |

**Table S3.** Univariate discriminatory power of the final model features. AUC values for all images and one image. The column shows the mean values obtained after 10 repetitions.

| Level of importance | Feature name                         | AUC:<br>All images used | Mean AUC:<br>One image used per patient |
|---------------------|--------------------------------------|-------------------------|-----------------------------------------|
| 1                   | MCC                                  | 0.760                   | 0.696                                   |
| 2                   | Location = falx (yes/no)             | 0.719                   | 0.736                                   |
| 3                   | DependenceEntropy                    | 0.828                   | 0.807                                   |
| 4                   | LargeDependenceHighGrayLevelEmphasis | 0.828                   | 0.833                                   |
| 5                   | Minimum                              | 0.699                   | 0.742                                   |
| 6                   | RunEntropy                           | 0.809                   | 0.723                                   |
| 7                   | SizeZoneNonUniformity                | 0.818                   | 0.746                                   |
| 8                   | GrayLevelNonUniformity.2             | 0.827                   | 0.789                                   |
